# Supplementary material for: Underdiagnosis of Major Depressive Episodes in Hemodialysis Patients: The Need for Screening and Patient Education
Source: MDPI journal article supplement (doi:10.3390/jcm10184109), 2021-09-11
Supplement: s1 [file s1]

## **The List of Explanations of Well-Being (LEWB)**

The following statements are about the patient's mental well-being.

Please mark one answer for each statement:

**1. My well-being is inherently related to a disease like mine (renal failure).**

Regarding the above statement I:

- a. strongly disagree      b. rather disagree      c. have no opinion      d. rather agree      e. strongly agree

**2. My well-being is related to my other diseases and/or conditions.**

Regarding the above statement I:

- a. strongly disagree      b. rather disagree      c. have no opinion      d. rather agree      e. strongly agree

**3. My well-being is not related to my current health condition.**

Regarding the above statement I:

- a. strongly disagree      b. rather disagree      c. have no opinion      d. rather agree      e. strongly agree

**4. My well-being is a symptom of renal failure.**

Regarding the above statement I:

- a. strongly disagree      b. rather disagree      c. have no opinion      d. rather agree      e. strongly agree

**5. My well-being is due to dialysis.**

Regarding the above statement I:

- a. strongly disagree      b. rather disagree      c. have no opinion      d. rather agree      e. strongly agree

**6. My well-being is a symptom of depression.**

Regarding the above statement I:

- a. strongly disagree      b. rather disagree      c. have no opinion      d. rather agree      e. strongly agree

**7. My well-being is related to factors other than illness, e.g. family problems, lack of work, etc.**

Regarding the above statement I:

- a. strongly disagree      b. rather disagree      c. have no opinion      d. rather agree      e. strongly agree
