# Supplementary material for: Underdiagnosis of Major Depressive Episodes in Hemodialysis Patients: The Need for Screening and Patient Education
Source: MDPI journal article supplement (doi:10.3390/jcm10184109), 2021-09-11
Supplement: s1 [file s1]

Well-being of patients with untreated depression according to the List of Explanations of Well-Being (LEWB), aggregated responses – detailed data.

| <b>My well-being is:</b>                                                           | <b>I strongly disagree</b> | <b>Rather disagree</b> | <b>I have no opinion</b> | <b>Rather agree</b> | <b>I strongly agree</b> |
|------------------------------------------------------------------------------------|----------------------------|------------------------|--------------------------|---------------------|-------------------------|
| inherently related to<br>a disease like mine (renal failure)                       | 8.2%<br>N=7                | 12.9%<br>N=11          | 3.5%<br>N=3              | 21.2%<br>N=18       | 54.1%<br>N=46           |
| related to my other diseases<br>and/or conditions                                  | 40.0%<br>N=34              | 3.5%<br>N=3            | 1.2%<br>N=1              | 3.5%<br>N=3         | 51.8%<br>N=44           |
| is not related to my current health condition                                      | 85.9%<br>N=73              | 3.5%<br>N=3            | 2.4%<br>N=2              | 7.1%<br>N=6         | 1.2%<br>N=1             |
| a symptom of renal failure                                                         | 36.5%<br>N=31              | 14.1%<br>N=12          | 7.1%<br>N=6              | 12.9%<br>N=11       | 29.4%<br>N=25           |
| due to hemodialysis                                                                | 35.3%<br>N=30              | 10.6%<br>N=9           | 4.7%<br>N=4              | 12.9%<br>N=11       | 36.5%<br>N=31           |
| a symptom of depression                                                            | 4.7%<br>N=4                | 14.1%<br>N=12          | 10.6%<br>N=9             | 11.8%<br>N=10       | 58.8%<br>N=50           |
| related to factors other than illness,<br>e.g. family problems, lack of work, etc. | 34.1%<br>N=29              | 2.4%<br>N=2            | 2.4%<br>N=2              | 5.9%<br>N=5         | 55.3%<br>N=47           |
